# Supplementary material
Source: publisher site journal article supplement (https://www.spandidos-publications.com/5567/downloadSupplementary)

Figure S1. Supratentorial location. (A) OR forest plot supratentorial location: Results demonstrated no statistically significant results (OR 2.13, CI 95% 0.98-4.63 and P=0.06). (B) Funnel plot of the supratentorial location in the group of patients with surgical management of intracranial meningiomas, demonstrated very high heterogeneity (P=0.02 and I<sup>2</sup>=75%). OR, odds ratio; CI, confidence interval; P, P-value; I<sup>2</sup>, the percentage of total variation across studies that is due to heterogeneity rather than chance; SE, standard error.

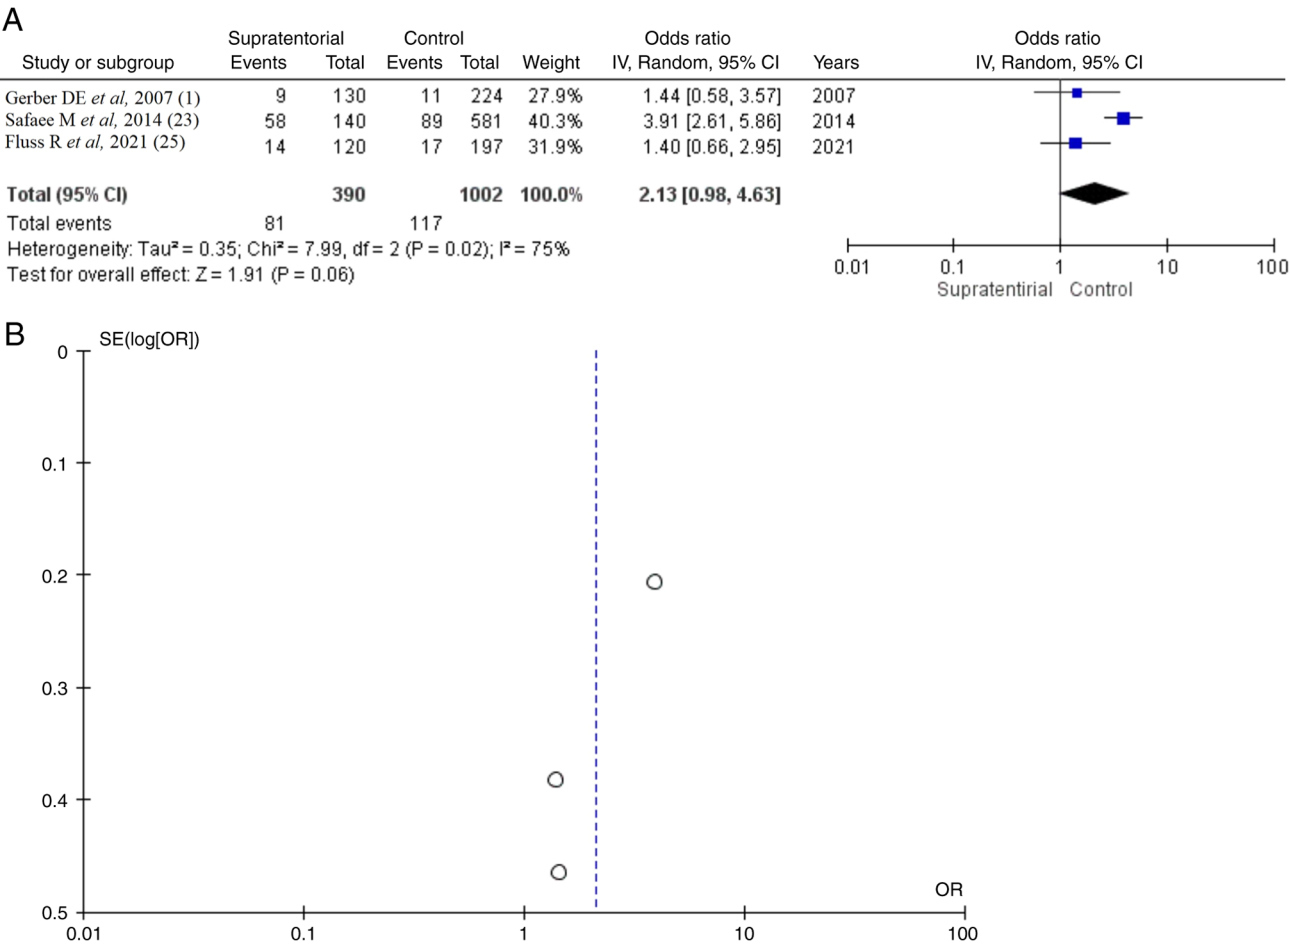

Figure S2. Infratentorial location. (A) OR forest plot infratentorial location: Results demonstrated no statistically significant results [OR 0.83, CI 95% (0.47-1.48),  $P=0.54$ ]. (B) Funnel plot of the infratentorial location in the group of patients with surgical management of intracranial meningiomas, providing no heterogeneity ( $P=0.91$  and  $I^2=0\%$ ). OR, odds ratio; CI, confidence interval; P, P-value;  $I^2$ , the percentage of total variation across studies that is due to heterogeneity rather than chance; SE, standard error.

A

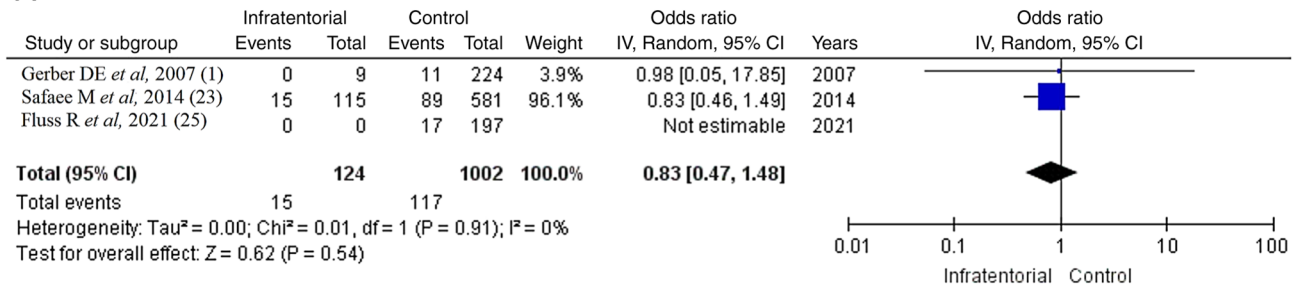

B

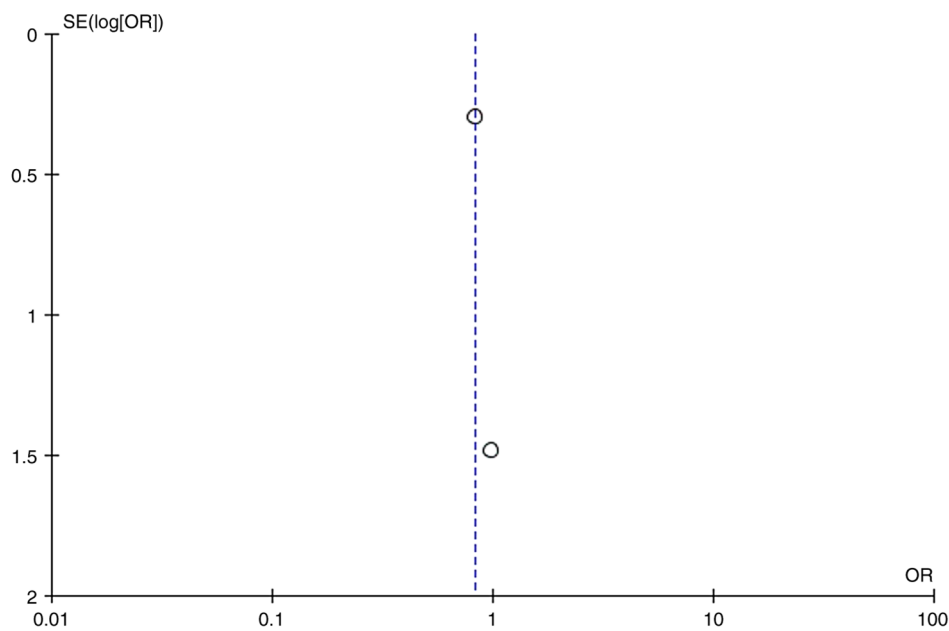

Figure S3. Skull base location. (A) OR Forest plot skull base location: Results demonstrated no statistically significant results (OR 0.58, CI 95% 0.23-1.46 and P=0.25). (B) Funnel plot of the skull base location in the group of patients with surgical management of intracranial meningiomas, providing low heterogeneity (P=0.23 and I<sup>2</sup>=33%). OR, odds ratio; CI, confidence interval; P, P-value; I<sup>2</sup>, the percentage of total variation across studies that is due to heterogeneity rather than chance; SE, standard error.

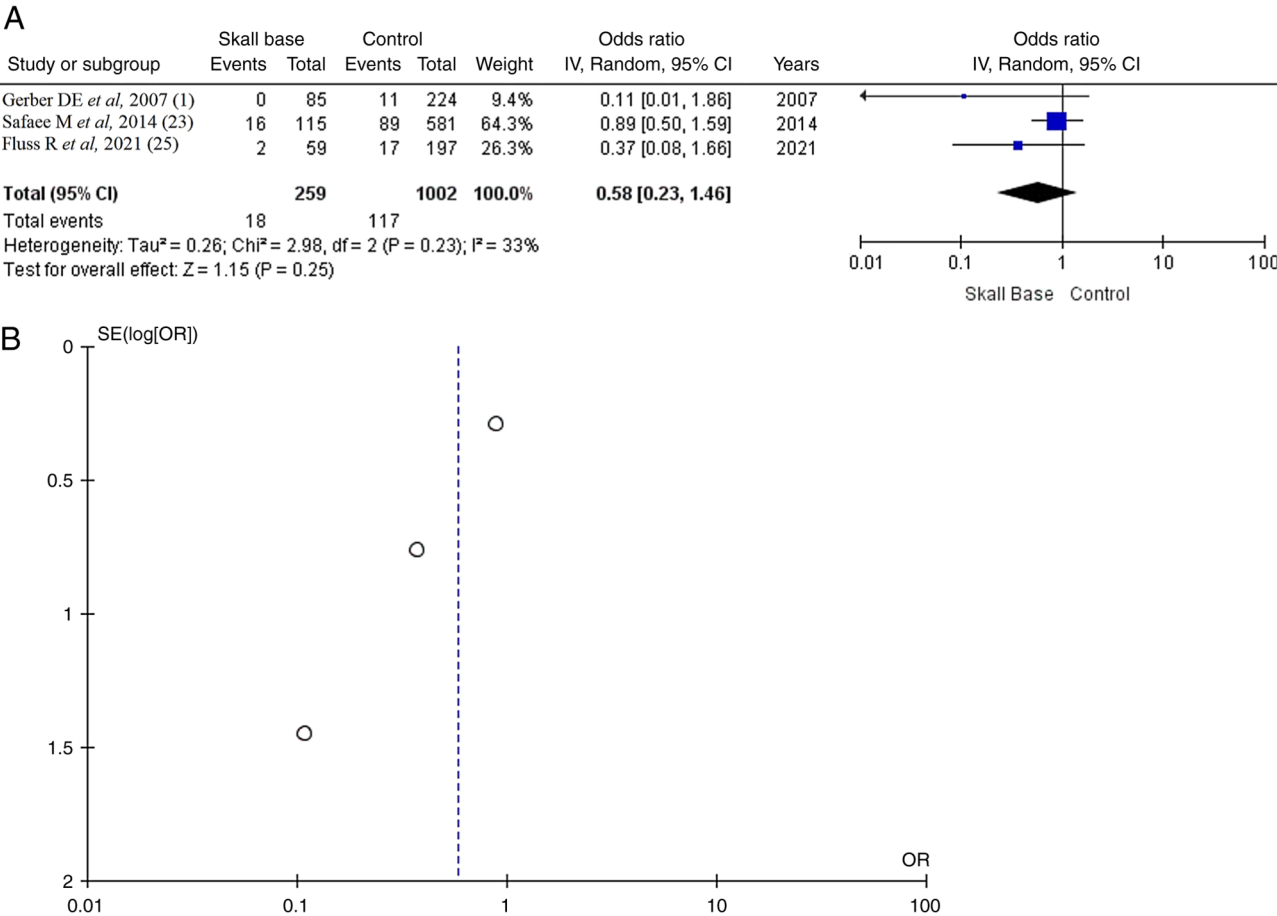

Figure S4. Ki-67 <2%. (A) OR Forest plot Ki-67 <2%: Results demonstrated no statistically significant results (OR 0.98, CI 95% 0.72-1.31 and P=0.87); (B) Funnel plot of the Ki-67 <2% in the group of patients with surgical management of intracranial meningiomas, providing no heterogeneity (P=0.76 and I<sup>2</sup>=0%). OR, odds ratio; CI, confidence interval; P, P-value; I<sup>2</sup>, the percentage of total variation across studies that is due to heterogeneity rather than chance; SE, standard error.

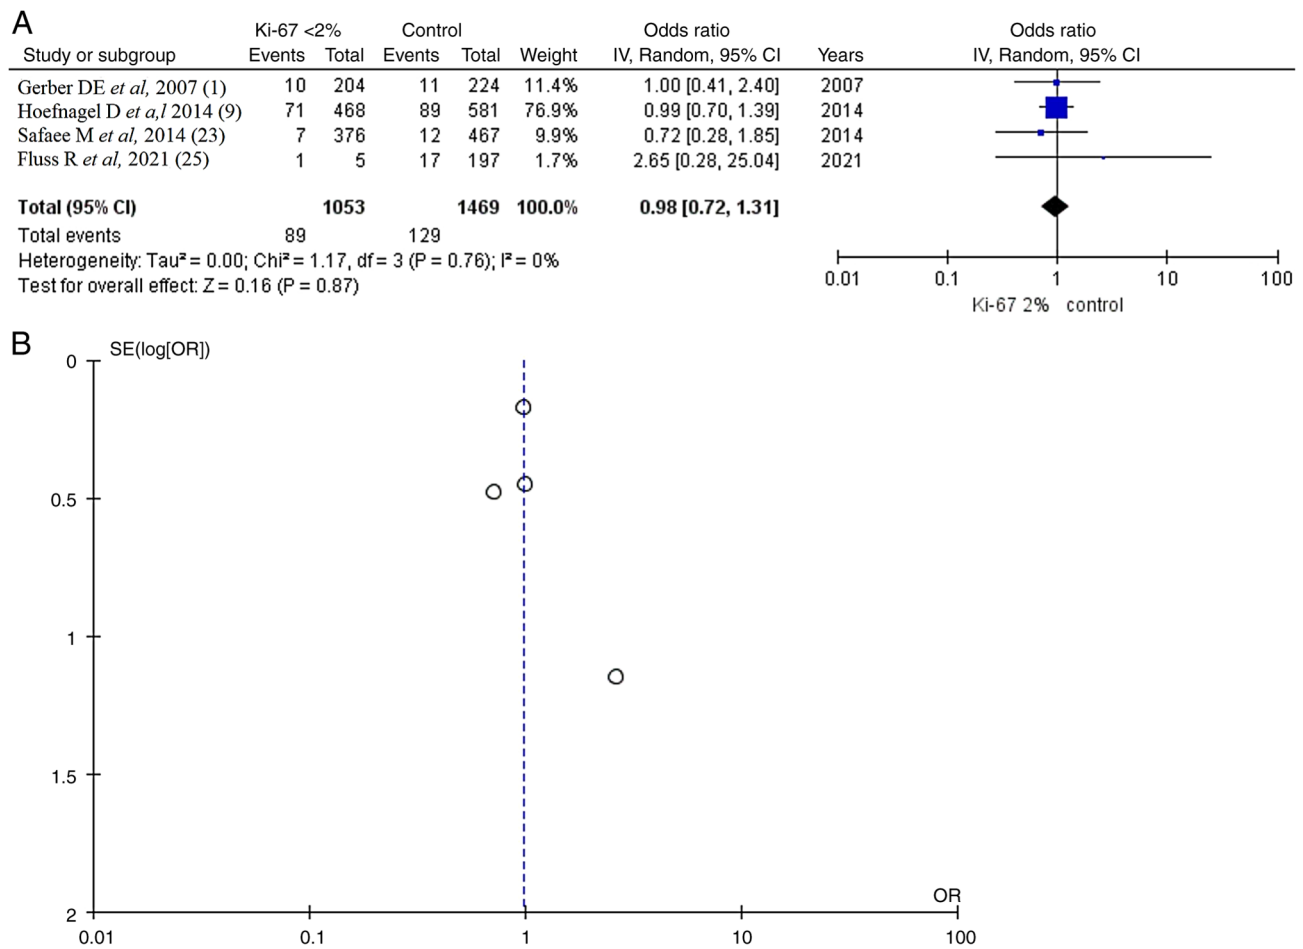

Figure S5. Ki-67 2-10%. (A) Forest plot Ki-67 2-10%: Results demonstrated no statistically significant result (OR 1.30, CI 95% 0.84-2.01 and  $P=0.24$ ). (B) Funnel plot, testing the sensitivity with funnel plot for Ki-67 2-10% there was no heterogeneity and thus low publication bias ( $P=0.45$  and  $I^2=0\%$ ). OR, odds ratio; CI, confidence interval; P, P-value;  $I^2$ , the percentage of total variation across studies that is due to heterogeneity rather than chance; SE, standard error.

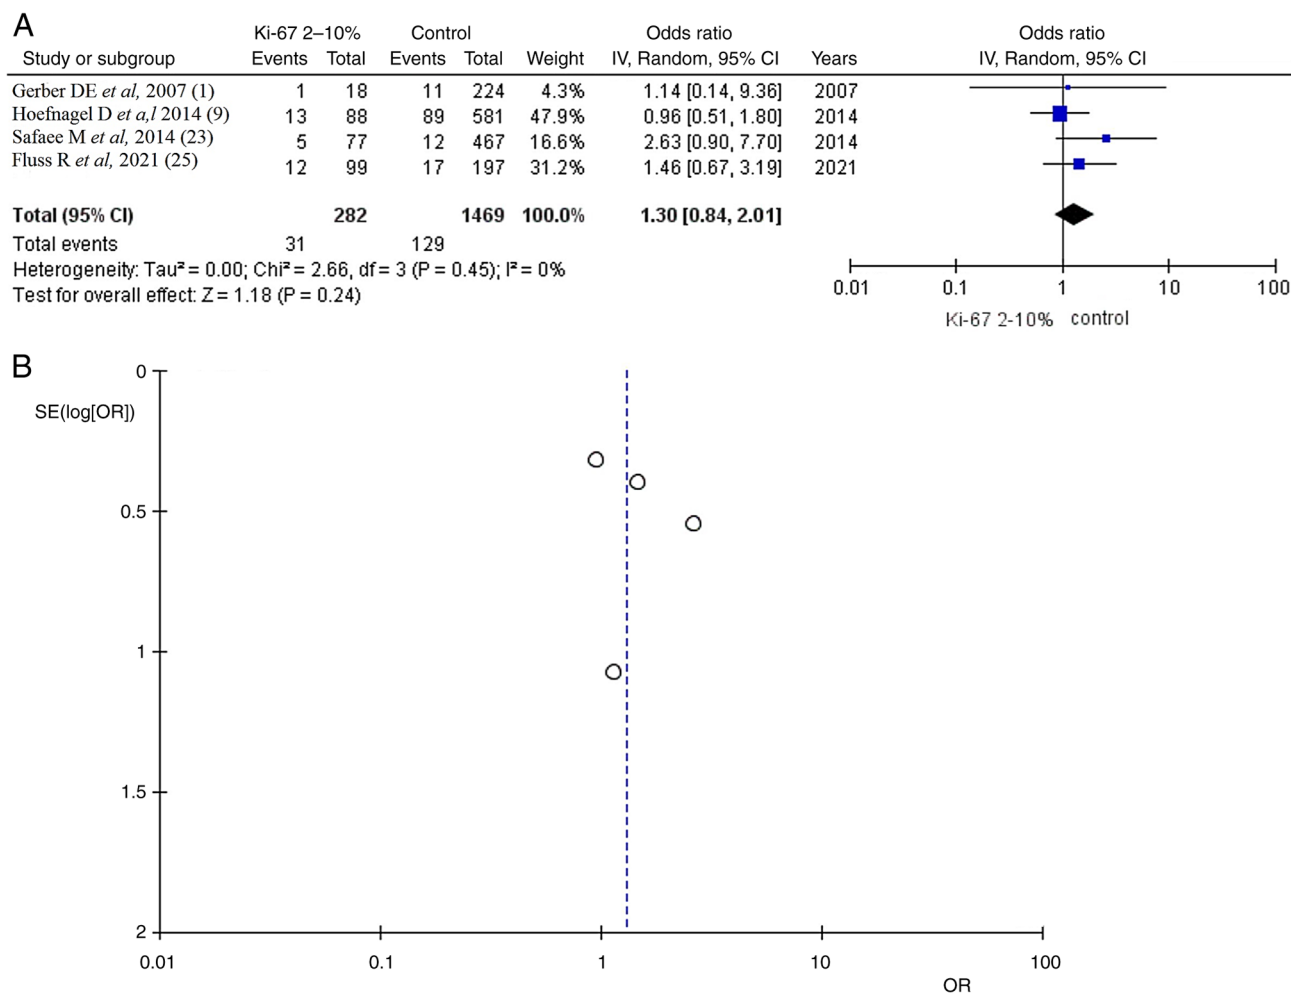

Figure S6. Ki-67 >10%. (A) Forest plot Ki-67 >10%: Results demonstrated no statistically significant result [OR 1.37, CI 95% (0.43-2.80), P=0.38]. (B) Funnel plot, testing the sensitivity with funnel plot for Ki-67 >10% there was no heterogeneity and thus low publication bias (P=0.86 and I<sup>2</sup>=0%). OR, odds ratio; CI, confidence interval; P, P-value; I<sup>2</sup>, the percentage of total variation across studies that is due to heterogeneity rather than chance; SE, standard error.

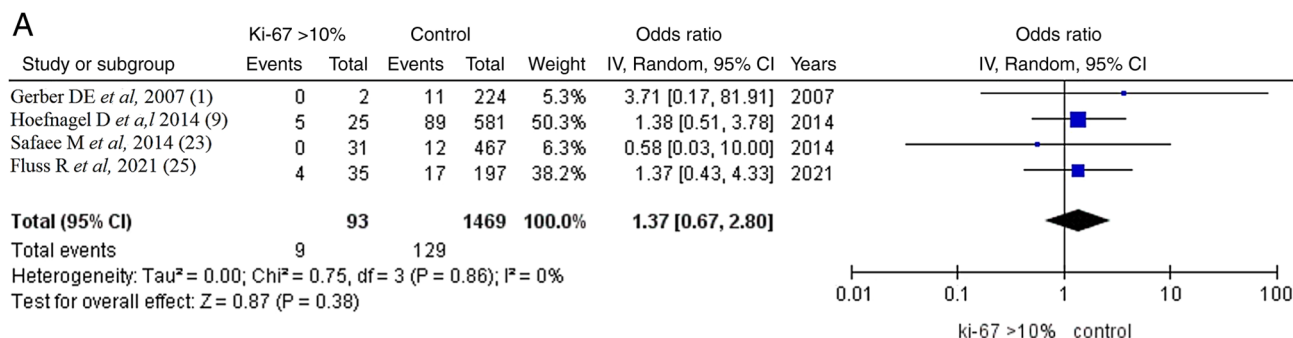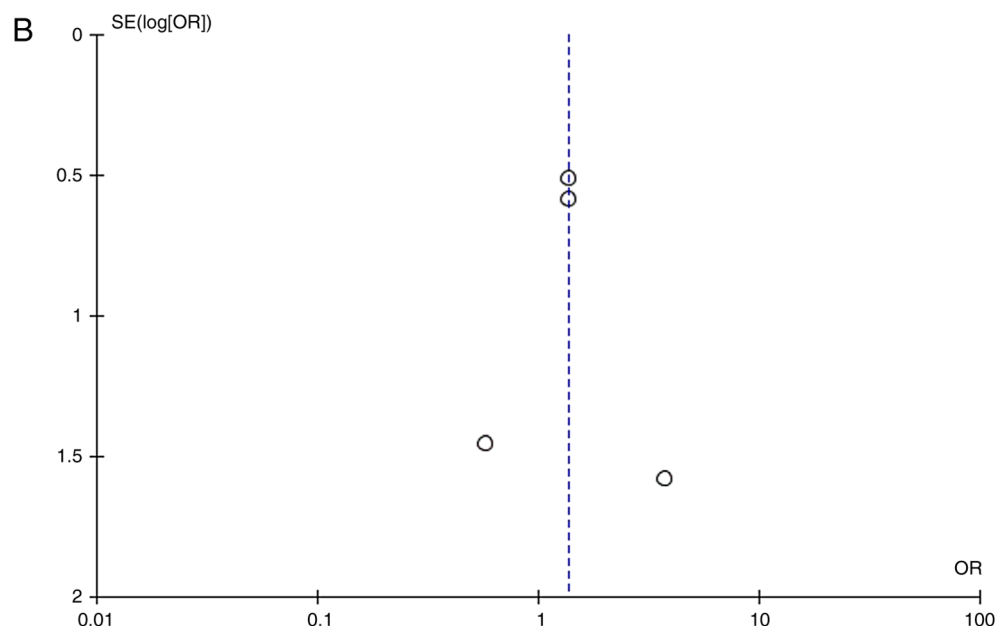

Supplement: Supplementary file 1 [file downloadSupplementary]
